# Supplementary material
Source: Research Square preprint supplement (doi:10.21203/rs.3.rs-9122877/v1)
Supplement: Supplementary file 1 [file c82370fa30cb6c7b7faa0d8f.docx]

**Supplementary material**

**1** Figure S1 Cloning and sequence analysis of the *CsLAC17* gene.

**2** Figure S2 Construction of the pTRV2-*CsLAC17* VIGS vector.

**3** Figure S3 Screening and validation of transgenic tobacco lines overexpressing *CsLAC17*.

**4** Figure S4 Codon optimization and vector construction for yeast heterologous expression of *CsLAC17*.

**5** Figure S5 PCR validation of Mut+ recombinant yeast strains.

**6** Table S1 Primer sequences

**a**

**b**


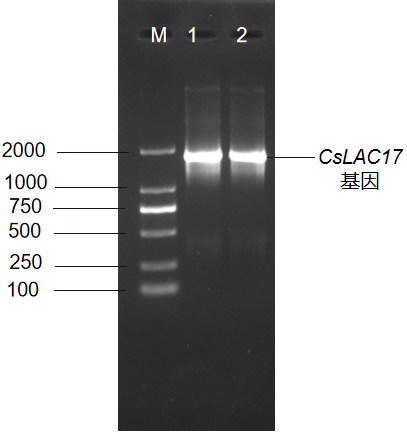

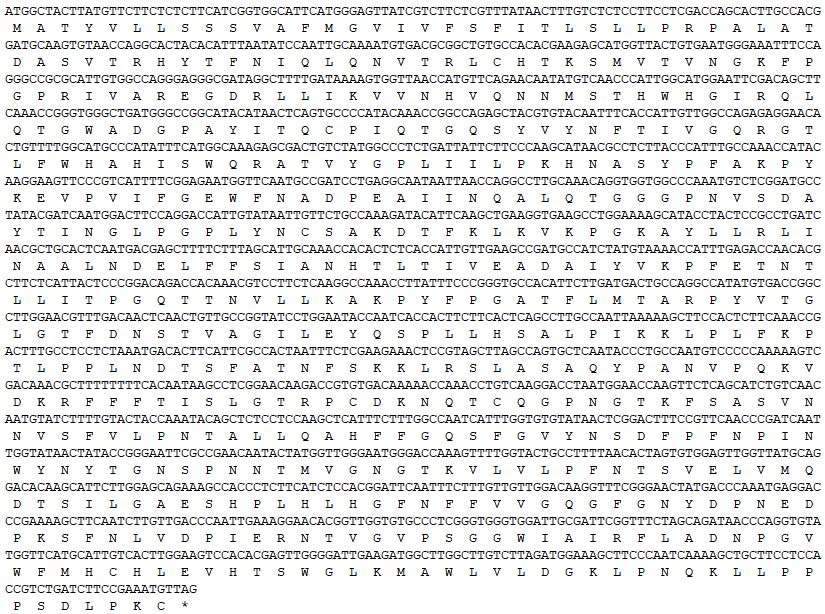


**Figure S1** Cloning and analysis of *CsLAC17* laccase gene. (a) Amplification results of *CsLAC17* laccase gene, M: DL2000 DNA marker, 1-Target gene. (b) Nucleotide sequence and amino acid sequence of *CsLAC17*


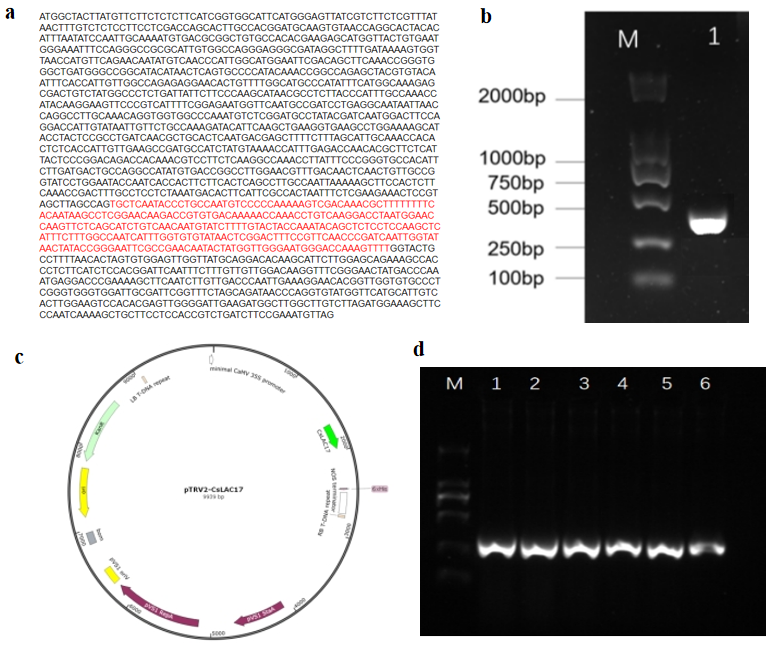


**Figure S2** Construction of the pTRV2-*CsLAC17* VIGS vector.(a) Selection of a specific fragment from the conserved region of *CsLAC17* for VIGS. (b) Amplification of the target fragment by PCR. M: DL 2000 DNA Marker; Lane 1: The amplified gene fragment. (c)  Schematic diagram of the recombinant pTRV2-*CsLAC17* vector. (d) Verification of the recombinant plasmids by colony PCR. M: DL 2000 DNA Marker; Lanes 1-6: PCR validation


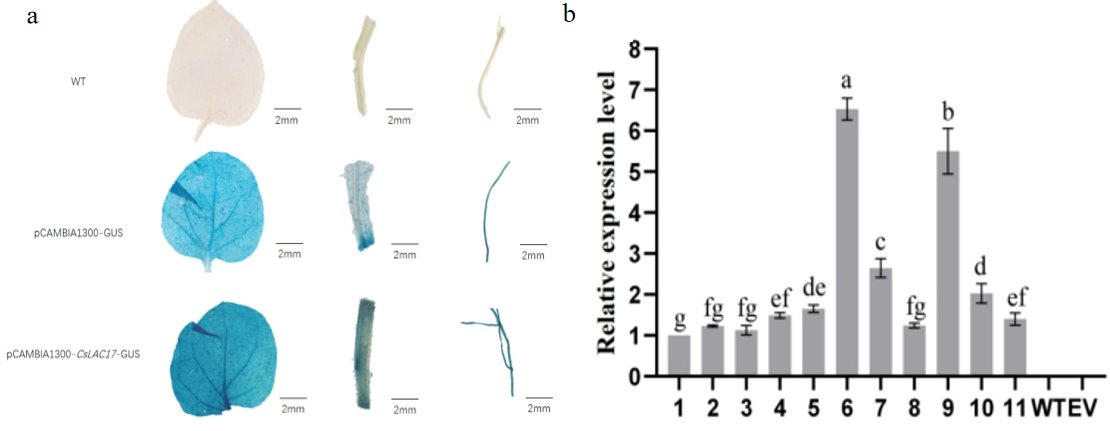


**Figure S3** Screening and validation of transgenic tobacco lines overexpressing *CsLAC17*. (a) Histochemical GUS staining of leaves from wild-type (WT), empty vector control (EV), and representative *CsLAC17*-transgenic lines. Blue staining indicates GUS activity, confirming the integration of the T-DNA. Scale bar = 1 cm. (b) Relative expression levels of the *CsLAC17* gene in different transgenic lines (TP1-TP11) as determined by qRT-PCR. Data are presented as the mean ± standard deviation (SD) from three biological replicates.

**b**

**a**


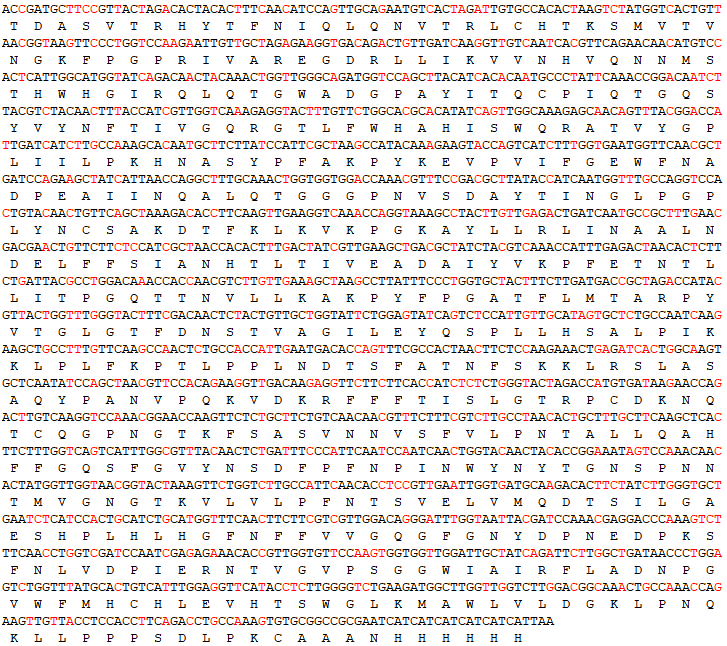

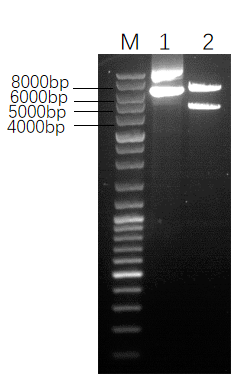


**Figure S4** (a) The sequence after codon optimization, the red part are the optimized sites.(b) Verification of double digestion of recombinant expression vector Note: M: DNA marker, 1: Recombinant plasmid, 2: Double enzyme digestion plasmid.

**Note: M: DNA Marker; 1: Plasmid; 2: Double enzyme digestion plasmid**


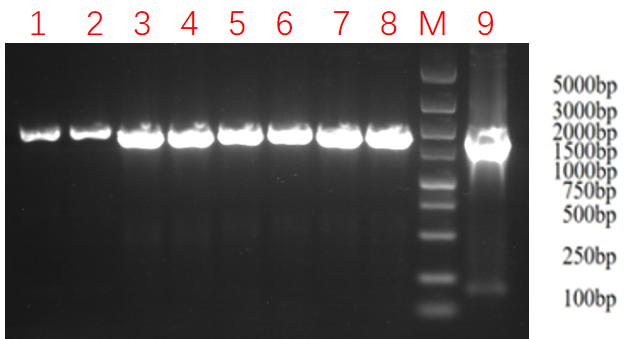


**Figure S5** PCR validation results for Mut+ type recombinant yeast engineering strain

Note: M: DL5000 DNA marker, 1-8: PCR validation results of different single colonies,

9: pPIC9K

**Table S1** Primer sequences

| Primer name | Sequence (5’-3’) | Purpose |
| --- | --- | --- |
| *CsGAPDH* | F: CACGGTCAATGGAAGCATCAT  R: GCAGCAGCCTTATCCTTATCAG | Reference gene in tea plants |
| *CsLAC17* | F: ATGGCTACTTATGTTCTTCTCT  R: ACATTTCGGAAGATCAGACGG | Gene cloning |
| *CsLAC17* | F: ggacgagctcggggtaccccATGGCTACTTATGTTCTTCTCT  R: gctcaccatgtcgacgctctagagcACATTTCGGAAGATCAGACGG | Overexpression Vector Construction |
| Hyg（481） | F: CTGCCCGCTGTTCTACAACCGG  R: GGAGCATATACGCCCGGAGTC | Validation of Transgenic Tobacco |
| TRV-*CsLAC17* | F: tgagtaaggttaccgaattcTGCTCAATACCCTGCCAATG  R: ggacatgcccgggcctcgagAAAACTTTGGTCCCATTCC | VIGS Vector Construction |
| *CsLAC17*(qRT-PCR) | F: TCAATACCCTGCCAATGTCC  R: GGTTTTTGTCACACGGTCTTG | Silencing Validation in tea plant |
| β-actin(qRT-PCR) | F: AGCTTCACCTCCCAGGTCATC  R: AGAACGCCTGTCAATCTTGG | Reference Gene in Tobacco |
